# Supplementary material for: Molecular Biology Networks and Key Gene Regulators for Inflammatory Biomarkers Shared by Breast Cancer Development: Multi-Omics Systems Analysis
Source: MDPI journal article supplement (doi:10.3390/biom11091379), 2021-09-18
Supplement: s1 [file s1]

Figure S1. Schematic diagram of the study. (CRP, C-reactive protein; eQTL, expression quantitative trait loci; GWAS, genome-wide association study; IL6, interleukin-6; MSEA, marker-set enrichment analysis; PPI, protein-to-protein interaction; SNP, single nucleotide polymorphism)

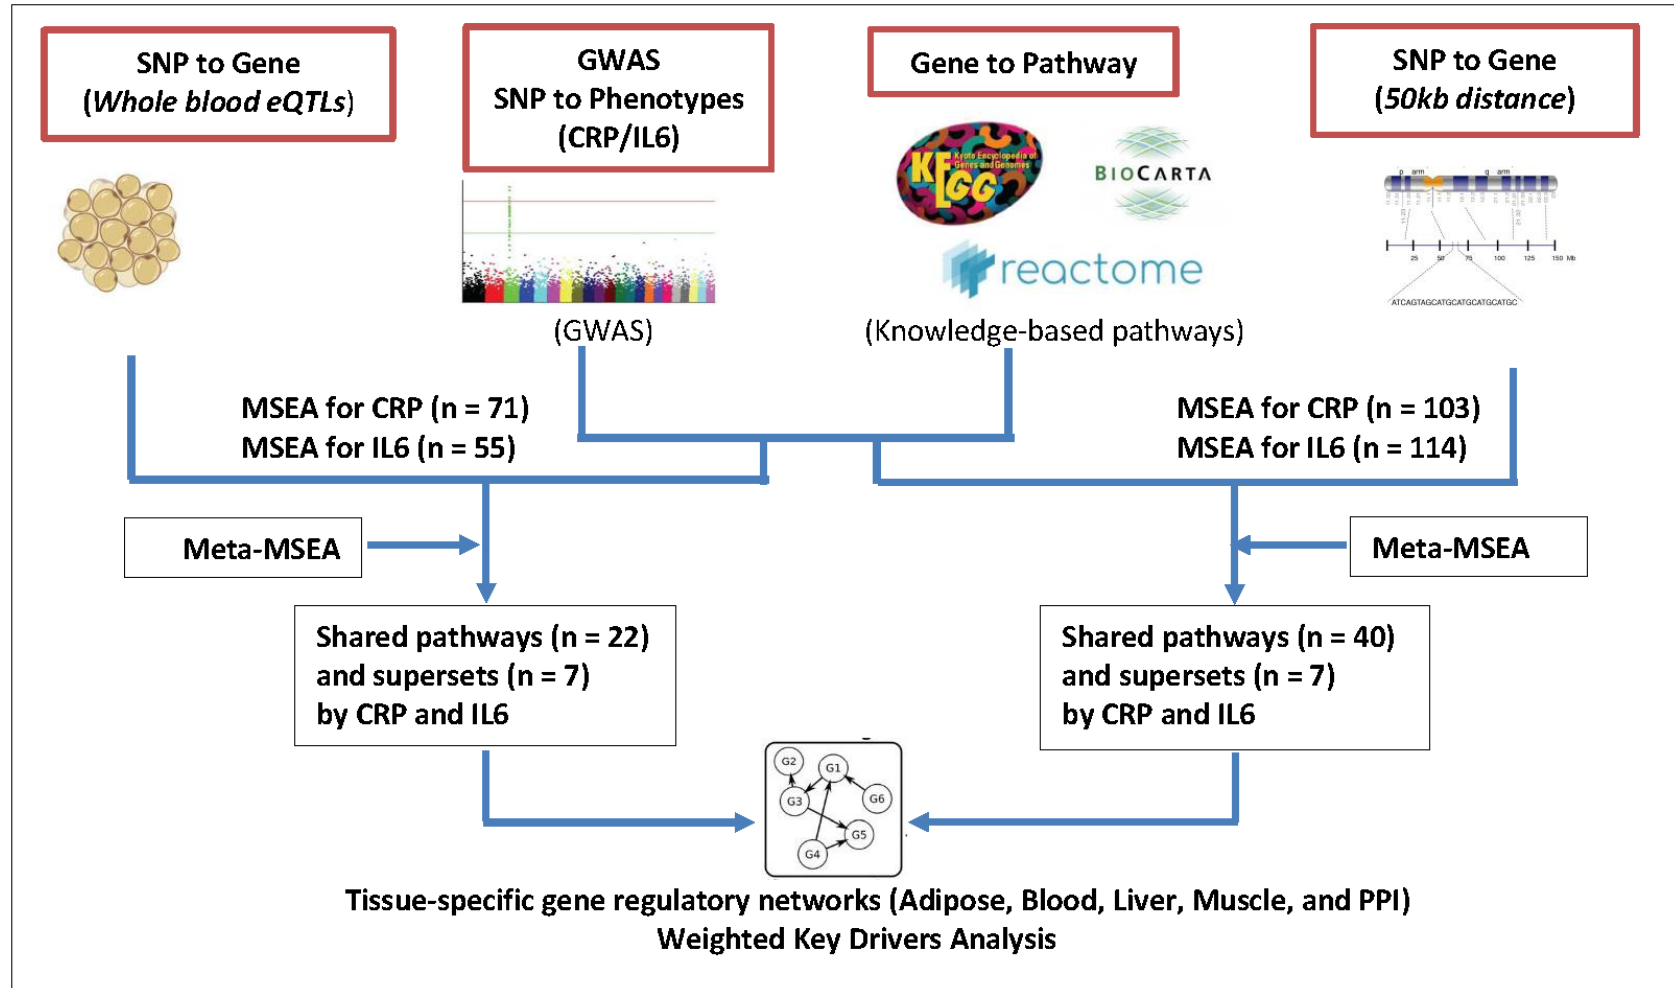

Figure S2. Comparison of significant pathways (false discovery rate [FDR] < 0.05) for C-reactive protein (CRP) phenotype between 50-kb distance-based and expression quantitative trait loci [eQTL]-based mapping.

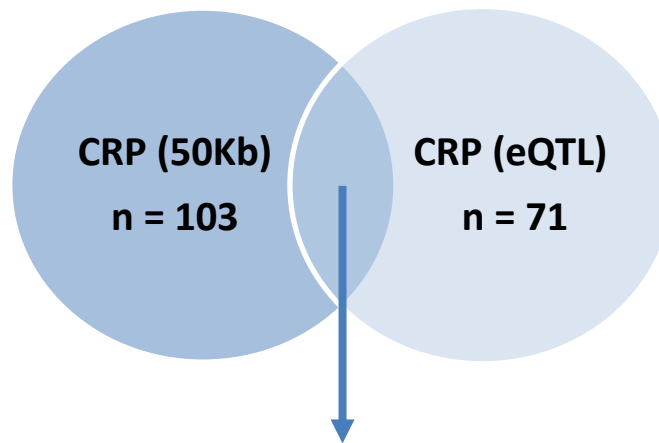

**Twenty-three common pathways**  
(about 22% of CRP-50 kb and 32% of CRP-eQTL)

| Pathway                                                                                        | Description                                         | Pathway                                | Description                                                                           |
|------------------------------------------------------------------------------------------------|-----------------------------------------------------|----------------------------------------|---------------------------------------------------------------------------------------|
| M12039                                                                                         | One carbon pool by folate                           | rctm0709                               | Mitochondrial protein import                                                          |
| rctm0495                                                                                       | Generic transcription pathway                       | rctm0678                               | Membrane trafficking                                                                  |
| rctm0798                                                                                       | Nuclear receptor transcription pathway              | rctm0854, rctm0594                     | Peptide hormone metabolism                                                            |
| M5109, M14314, rctm0690, M1724, rctm0929, M17726, rctm0961                                     | Pyrimidine metabolism                               | M17400, rctm1113                       | ALK in cardiac myocytes                                                               |
| AD_Positive                                                                                    | Positive control for AD                             | M4383                                  | Actions of nitric oxide in the heart                                                  |
| rctm0602, rctm0871, rctm0601                                                                   | Integrin cell surface interactions                  | M1547, M5290                           | Control of skeletal myogenesis by HDAC and calcium/calmodulin-dependent kinase (CaMK) |
| M6856                                                                                          | Hematopoietic cell lineage                          | M8104                                  | Amino sugar and nucleotide sugar metabolism                                           |
| rctm0457                                                                                       | G0 and early G1                                     | rctm0933, M3985                        | Pyruvate metabolism and citric acid (TCA) cycle                                       |
| rctm0517                                                                                       | Golgi cisternae pericentriolar stack reorganization | rctm0647                               | Lipid digestion, mobilization, and transport                                          |
| rctm0238, rctm1256, rctm0463, rctm0044, M16853, rctm0307, M13515, rctm0387, rctm0639, rctm1253 | Chromosome maintenance                              | rctm0289, rctm0611, rctm0613, rctm0612 | Cytokine signaling in immune system                                                   |
| rctm1346, rctm0055, rctm0053                                                                   | Unfolded protein response                           | M9052                                  | Phosphatidylinositol signaling system                                                 |
| M6981                                                                                          | Protein export                                      |                                        |                                                                                       |

Figure S3. Comparison of significant pathways (false discovery rate [FDR] < 0.05) for interleukin 6 (IL6) phenotype between 50-kb distance-based and expression quantitative trait loci [eQTL]-based mapping.

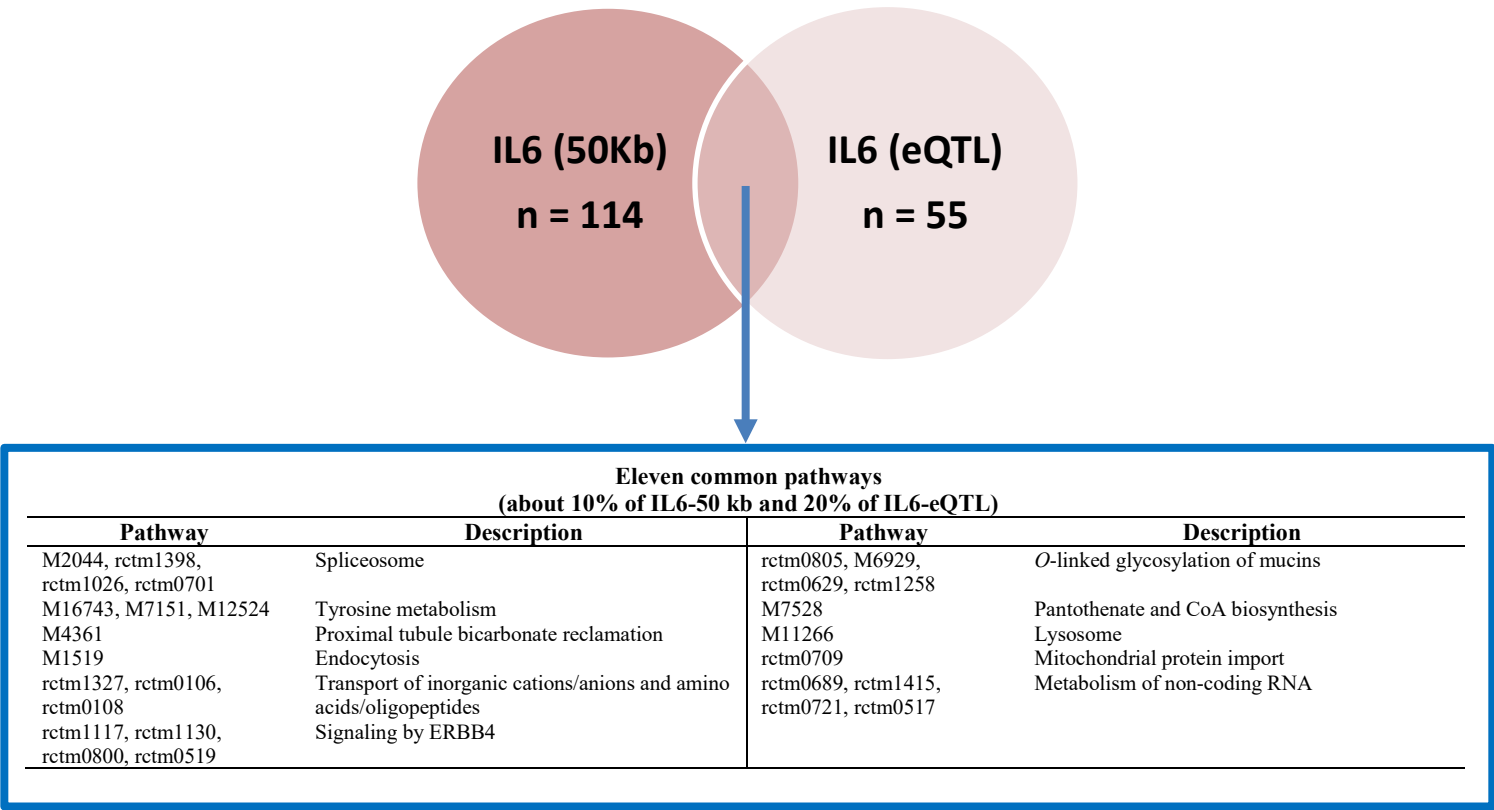

Figure S4. Comparison of significant pathways (false discovery rate [FDR] < 0.05) between C-reactive protein (CRP) and interleukin-6 (IL6) phenotypes across distance-based and expression quantitative trait loci [eQTL]-based mapping. Note: The yellow-highlighted pathways overlap with those from the meta-analysis of CRP and IL-6 in either mapping or their downstream cascades.

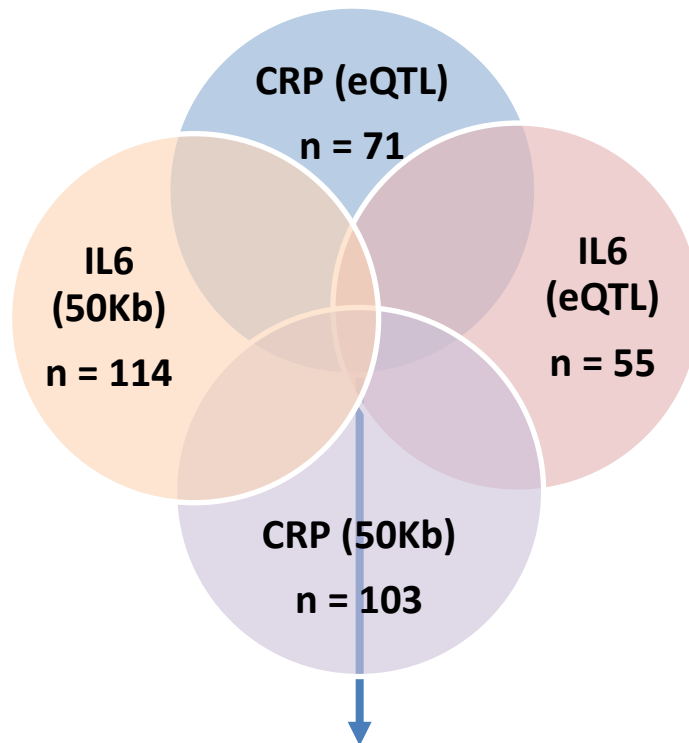

**Twenty-one common pathways (from meta-analysis) shared by CRP and IL6 across distance-based and eQTL-based mapping**

| Pathway                                                                | FDR < 0.05 |
|------------------------------------------------------------------------|------------|
| Defects in vitamin and cofactor metabolism                             | 3.51E-86   |
| Downregulation of TGF-beta receptor signaling                          | 4.29E-71   |
| Initial triggering of complement                                       | 2.06E-69   |
| Regulation of beta-cell development                                    | 9.49E-65   |
| TGF-beta receptor signaling activates SMADs                            | 9.04E-64   |
| Mitochondrial protein import                                           | 2.11E-61   |
| Integrin signaling                                                     | 1.72E-60   |
| Platelet aggregation (plug formation)                                  | 1.08E-56   |
| Notch-HLH transcription pathway                                        | 1.81E-49   |
| Chemokine receptors bind chemokines                                    | 7.38E-47   |
| Complement cascade                                                     | 1.14E-43   |
| Selective expression of chemokine receptors during T-cell polarization | 2.89E-42   |
| Chemokine signaling pathway                                            | 2.24E-40   |
| Signaling by NOTCH1                                                    | 2.61E-40   |
| IL12- and STAT4-dependent signaling pathway in Th1 development         | 1.24E-37   |
| Interleukin-10 signaling                                               | 5.02E-35   |
| SUMOylation of DNA damage response and repair proteins                 | 9.79E-28   |
| Transcriptional regulation by RUNX1                                    | 2.94E-21   |
| Golgi cisternae pericentriolar stack reorganization                    | 4.68E-21   |
| JAK-STAT signaling pathway                                             | 1.94E-20   |
| MAP2K and MAPK activation                                              | 1.77E-16   |

Table S1. MSEA analysis of CRP pathways (CRP, 50-kb distance-based mapping; pathways arranged by ascending FDR)

| <b>Module*<br/>(n=103)</b> | <b>Description</b>                                                     | <b>FDR &lt; 0.05</b> | <b>n of<br/>genes</b> | <b>n of<br/>SNPs</b> |
|----------------------------|------------------------------------------------------------------------|----------------------|-----------------------|----------------------|
| M17844                     | Other glycan degradation                                               | 4.67E-24             | 16                    | 2,184                |
| rctm1363                   | Vitamin B5 (pantothenate) metabolism                                   | 5.22E-21             | 11                    | 1,437                |
| rctm0289..                 | Cytokine signaling in immune system                                    | 8.81E-21             | 105                   | 12,989               |
| rctm0238..                 | Chromosome maintenance                                                 | 1.03E-20             | 94                    | 12,810               |
| rctm0411                   | Factors involved in megakaryocyte development and platelet production  | 1.04E-20             | 114                   | 18,138               |
| rctm0104                   | Amine-derived hormones                                                 | 7.10E-20             | 15                    | 2,332                |
| rctm0255                   | Cobalamin (Cbl, vitamin B12) transport and metabolism                  | 1.38E-19             | 19                    | 3,178                |
| rctm0567..                 | Immunoregulatory interactions between lymphoid and non-lymphoid cells  | 2.16E-19             | 106                   | 12,576               |
| M17411..                   | JAK-STAT signaling pathway                                             | 8.67E-18             | 133                   | 16,062               |
| rctm0838..                 | PKB-mediated events                                                    | 1.23E-17             | 29                    | 4,164                |
| rctm1011..                 | Regulation of beta-cell development                                    | 4.17E-16             | 33                    | 4,228                |
| rctm0214                   | Caspase-mediated cleavage of cytoskeletal proteins                     | 6.74E-13             | 11                    | 1,851                |
| rctm1147..                 | Signaling by TGF-beta receptor complex                                 | 3.56E-12             | 87                    | 11,845               |
| rctm0709                   | Mitochondrial protein import                                           | 3.80E-12             | 44                    | 4,815                |
| M12039                     | One carbon pool by folate                                              | 6.70E-12             | 17                    | 2,834                |
| M1467..                    | The co-stimulatory signal during T-cell activation                     | 7.82E-12             | 35                    | 4,239                |
| rctm0495                   | Generic transcription pathway                                          | 4.21E-11             | 427                   | 47,491               |
| M8104..                    | Amino sugar and nucleotide sugar metabolism                            | 5.68E-11             | 82                    | 11,469               |
| M17400..                   | ALK in cardiac myocytes                                                | 5.77E-11             | 42                    | 6,555                |
| rctm0540..                 | Homologous recombination repair                                        | 6.91E-11             | 16                    | 2,604                |
| M9131..                    | Glycerophospholipid metabolism                                         | 8.52E-11             | 91                    | 13,344               |
| M14449                     | METS effect on macrophage differentiation                              | 1.09E-10             | 18                    | 2,457                |
| rctm0226                   | Cell-extracellular matrix interactions                                 | 2.01E-10             | 13                    | 2,621                |
| M7772                      | fl-arrestins in GPCR desensitization                                   | 2.96E-10             | 10                    | 2,240                |
| M9052                      | Phosphatidylinositol signaling system                                  | 1.07E-09             | 70                    | 14,778               |
| rctm0410                   | Facilitative Na <sup>+</sup> -independent glucose transporters         | 3.30E-09             | 12                    | 1,986                |
| M5244                      | Glyoxylate and dicarboxylate metabolism                                | 3.98E-09             | 16                    | 2,236                |
| rctm0798                   | Nuclear receptor transcription pathway                                 | 5.98E-09             | 48                    | 9,174                |
| M13917                     | Role of Parkin in the ubiquitin-proteasomal pathway                    | 1.57E-08             | 11                    | 3,743                |
| rctm0368                   | Elastic fibre formation                                                | 6.42E-08             | 41                    | 6,860                |
| rctm0602..                 | Integrin cell surface interactions                                     | 2.22E-07             | 102                   | 20,947               |
| rctm1250                   | Tandem pore domain potassium channels                                  | 2.56E-07             | 12                    | 2,233                |
| M2164                      | Leukocyte transendothelial migration                                   | 5.26E-07             | 107                   | 20,207               |
| rctm0967                   | Rap1 signaling                                                         | 6.52E-07             | 15                    | 3,892                |
| rctm1220                   | Synthesis of glycosylphosphatidylinositol (GPI)                        | 1.10E-06             | 15                    | 1,766                |
| M4047..                    | Selective expression of chemokine receptors during T-cell polarization | 1.10E-06             | 44                    | 6,205                |
| rctm0891..                 | Potassium channels                                                     | 1.59E-06             | 58                    | 11,583               |

Table S1 (Continued)

| <b>Module*<br/>(n=103)</b> | <b>Description</b>                                                        | <b>FDR &lt; 0.05</b> | <b>n of<br/>genes</b> | <b>n of<br/>SNPs</b> |
|----------------------------|---------------------------------------------------------------------------|----------------------|-----------------------|----------------------|
| AD Positive                | Positive control for AD                                                   | 2.25E-06             | 140                   | 40,759               |
| rctm0987..                 | Regulation of cholesterol biosynthesis by SREBP                           | 3.44E-06             | 49                    | 7,165                |
| rctm1346..                 | Unfolded protein response                                                 | 3.62E-06             | 59                    | 6,852                |
| M17906..                   | Vibrio cholerae infection                                                 | 4.85E-06             | 76                    | 13,174               |
| rctm0662                   | MHC class II antigen presentation                                         | 9.85E-06             | 83                    | 10,974               |
| rctm0457                   | G0 and early G1                                                           | 1.28E-05             | 24                    | 2,793                |
| M13883..                   | How progesterone initiates oocyte membrane                                | 1.81E-05             | 75                    | 11,619               |
| rctm0933..                 | Pyruvate metabolism and the citric acid (TCA) cycle                       | 2.29E-05             | 33                    | 4,201                |
| M6981                      | Protein export                                                            | 2.79E-05             | 22                    | 2,820                |
| M4835                      | B cell survival pathway                                                   | 6.04E-05             | 14                    | 1,953                |
| M4383..                    | Actions of nitric oxide in the heart                                      | 0.0001               | 58                    | 12,815               |
| rctm0647..                 | Lipid digestion, mobilization, and transport                              | 0.0002               | 72                    | 13,080               |
| M10547                     | Role of MAL in rho-mediated activation of SRF                             | 0.0002               | 19                    | 2,421                |
| M13950                     | Asthma                                                                    | 0.0003               | 15                    | 1,562                |
| rctm1201                   | Synthesis of PC                                                           | 0.0004               | 17                    | 2,839                |
| rctm0054                   | Activation of Chaperones by ATF6-alpha                                    | 0.0004               | 11                    | 1,349                |
| rctm0809..                 | Opioid signaling                                                          | 0.0005               | 327                   | 53,980               |
| rctm1178                   | Striated muscle contraction                                               | 0.0006               | 31                    | 3,870                |
| rctm0533..                 | Hexose transport                                                          | 0.0007               | 46                    | 6,105                |
| rctm0174                   | Biotin transport and metabolism                                           | 0.0010               | 10                    | 2,044                |
| M2404                      | Mechanism of gene regulation by peroxisome proliferators via PPARa(alpha) | 0.0010               | 54                    | 8,543                |
| rctm0854..                 | Peptide hormone metabolism                                                | 0.0011               | 53                    | 7,739                |
| rctm0221..                 | Cell death signaling via NUAGE, NRIF and NADE                             | 0.0012               | 62                    | 13,850               |
| M3214                      | Primary bile acid biosynthesis                                            | 0.0012               | 16                    | 1,903                |
| rctm0547                   | Hyaluronan metabolism                                                     | 0.0013               | 13                    | 1,770                |
| rctm0517                   | Golgi cisternae pericentriolar stack reorganization                       | 0.0013               | 12                    | 1,403                |
| M1296                      | IL-7 signal transduction                                                  | 0.0014               | 16                    | 2,285                |
| M17636..                   | Renin-angiotensin system                                                  | 0.0017               | 20                    | 2,734                |
| rctm0714..                 | Mitotic anaphase                                                          | 0.0020               | 97                    | 13,551               |
| rctm0118..                 | Antigen processing: ubiquitination and proteasome degradation             | 0.0022               | 200                   | 28,927               |
| rctm0678..                 | Membrane trafficking                                                      | 0.0026               | 128                   | 16,818               |
| M8560..                    | Cell cycle: G2/M checkpoint                                               | 0.0033               | 35                    | 4,786                |
| rctm0817                   | Other semaphorin interactions                                             | 0.0033               | 18                    | 4,264                |
| rctm1091                   | Scavenging by Class A receptors                                           | 0.0034               | 18                    | 3,750                |
| M12851                     | Cell-to-Cell adhesion signaling                                           | 0.0036               | 14                    | 5,405                |
| rctm0271..                 | Constitutive signaling by NOTCH1 PEST domain mutants                      | 0.0036               | 76                    | 11,561               |
| rctm0894                   | Pre-NOTCH processing in Golgi                                             | 0.0044               | 18                    | 2,843                |
| M15569                     | NOD-like receptor signaling pathway                                       | 0.0049               | 54                    | 6,527                |

Table S1 (Continued)

| <b>Module*<br/>(n=103)</b> | <b>Description</b>                                                                                                     | <b>FDR &lt; 0.05</b> | <b>n of<br/>genes</b> | <b>n of<br/>SNPs</b> |
|----------------------------|------------------------------------------------------------------------------------------------------------------------|----------------------|-----------------------|----------------------|
| M6856                      | Hematopoietic cell lineage                                                                                             | 0.0057               | 78                    | 10,360               |
| M12899                     | Glycosphingolipid biosynthesis - globo series                                                                          | 0.0061               | 13                    | 1,986                |
| M194                       | Proteasome complex                                                                                                     | 0.0062               | 17                    | 1,966                |
| rctm1040..                 | Resolution of AP sites via the single-nucleotide replacement pathway                                                   | 0.0066               | 12                    | 1,281                |
| rctm0173                   | Biosynthesis of the N-glycan precursor (dolichol lipid-linked oligosaccharide [LLO]) and transfer to a nascent protein | 0.0076               | 28                    | 3,040                |
| rctm0258..                 | Collagen biosynthesis and modifying enzymes                                                                            | 0.0085               | 65                    | 14,557               |
| M1547..                    | Control of skeletal myogenesis by HDAC and calcium/calmodulin-dependent kinase (CaMK)                                  | 0.0091               | 39                    | 6,438                |
| M2499                      | CARM1 and regulation of the estrogen receptor                                                                          | 0.0101               | 32                    | 5,837                |
| M3812                      | Amyotrophic lateral sclerosis (ALS)                                                                                    | 0.0102               | 50                    | 8,090                |
| M16120                     | How Salmonella hijacks a cell                                                                                          | 0.0103               | 12                    | 1,626                |
| M6929                      | O-glycan biosynthesis                                                                                                  | 0.0119               | 28                    | 7,515                |
| M917                       | Complement pathway                                                                                                     | 0.0121               | 15                    | 2,415                |
| rctm1336                   | Tryptophan catabolism                                                                                                  | 0.0121               | 11                    | 1,742                |
| M11358                     | Tumor suppressor Arf inhibits ribosomal biogenesis                                                                     | 0.0121               | 17                    | 2,356                |
| M5109                      | Pyrimidine metabolism                                                                                                  | 0.0122               | 91                    | 12,987               |
| rctm1109                   | Signal attenuation                                                                                                     | 0.0123               | 13                    | 2,287                |
| rctm0365                   | Effects of PIP2 hydrolysis                                                                                             | 0.0125               | 24                    | 6,850                |
| rctm0418..                 | Fcγ receptor (FcγR) dependent phagocytosis                                                                             | 0.0213               | 72                    | 11,921               |
| rctm0227..                 | Cellular response to hypoxia                                                                                           | 0.0215               | 24                    | 2,479                |
| M5669                      | Natural killer cell mediated cytotoxicity                                                                              | 0.0261               | 121                   | 17,356               |
| M4891                      | Regulation of transcriptional activity by PML                                                                          | 0.0277               | 17                    | 2,623                |
| rctm1123..                 | Signaling by FGFR1 mutants                                                                                             | 0.0278               | 29                    | 4,765                |
| rctm0960                   | RNA polymerase III transcription initiation                                                                            | 0.0283               | 35                    | 4,104                |
| rctm0619                   | Interleukin-6 signaling                                                                                                | 0.0323               | 11                    | 1,788                |
| rctm1170..                 | Sphingolipid metabolism                                                                                                | 0.0328               | 56                    | 10,313               |
| M12975                     | VEGF, hypoxia, and angiogenesis                                                                                        | 0.0348               | 27                    | 4,885                |
| rctm0890..                 | Postsynaptic nicotinic acetylcholine receptors                                                                         | 0.0370               | 14                    | 1,397                |
| rctm1265                   | Canonical retinoid cycle in rods (twilight vision)                                                                     | 0.0386               | 16                    | 2,042                |

CRP, C-reactive protein; FDR, false discovery rate; MSEA, marker-set enrichment analysis; SNP, single-nucleotide polymorphism.

\* Modules marked with two periods (..) are those that are merged.

Table S2. MSEA analysis of CRP pathways (CRP, eQTL-based mapping; pathways arranged by ascending FDR)

| <b>Module*<br/>(n=71)</b> | <b>Description</b>                                             | <b>FDR &lt; 0.05</b> | <b>n of<br/>genes</b> | <b>n of<br/>SNPs</b> |
|---------------------------|----------------------------------------------------------------|----------------------|-----------------------|----------------------|
| rctm0696..                | Metabolism of vitamins and cofactors                           | 4.54E-167            | 44                    | 2,969                |
| M12039                    | One carbon pool by folate                                      | 2.51E-86             | 10                    | 1,267                |
| M4319..                   | IL12 and Stat4 dependent signaling pathway in Th1 development  | 1.48E-71             | 19                    | 1,110                |
| rctm0495                  | Generic transcription pathway                                  | 1.98E-61             | 222                   | 12,247               |
| rctm0732..                | MyD88 cascade initiated on plasma membrane                     | 1.26E-55             | 61                    | 3,010                |
| rctm0798                  | Nuclear receptor transcription pathway                         | 3.55E-54             | 13                    | 417                  |
| rctm0166                  | Bile acid and bile salt metabolism                             | 1.78E-52             | 10                    | 699                  |
| M4741                     | Systemic lupus erythematosus                                   | 1.19E-50             | 43                    | 1,800                |
| rctm0458..                | G1 phase                                                       | 2.02E-49             | 30                    | 1,743                |
| rctm1155..                | Signaling by NGF                                               | 2.14E-43             | 106                   | 5,342                |
| M14933..                  | Steroid hormone biosynthesis                                   | 2.85E-34             | 20                    | 1,943                |
| M5109..                   | Pyrimidine metabolism                                          | 1.93E-33             | 78                    | 5,137                |
| AD_Positive               | Positive control for AD                                        | 1.19E-28             | 71                    | 5,831                |
| M4629                     | Nitrogen metabolism                                            | 9.50E-28             | 10                    | 796                  |
| M9809..                   | Cytokine-cytokine receptor interaction                         | 2.32E-27             | 117                   | 4,413                |
| M7330                     | Glycosaminoglycan biosynthesis - heparan sulfate               | 1.41E-21             | 15                    | 501                  |
| M5785                     | Taste transduction                                             | 4.71E-21             | 10                    | 648                  |
| M17758                    | Alanine, aspartate and glutamate metabolism                    | 1.53E-19             | 15                    | 1,200                |
| rctm0602..                | Integrin cell surface interactions                             | 1.05E-17             | 42                    | 2,352                |
| M6856                     | Hematopoietic cell lineage                                     | 1.36E-17             | 31                    | 1,279                |
| rctm1133..                | Signaling by NOTCH                                             | 6.04E-17             | 43                    | 2,467                |
| rctm0457                  | G0 and Early G1                                                | 7.58E-17             | 10                    | 509                  |
| M766                      | Glycine, serine, and threonine metabolism                      | 4.11E-16             | 14                    | 1,123                |
| rctm0517                  | Golgi cisternae pericentriolar stack reorganization            | 3.86E-14             | 11                    | 606                  |
| M17857                    | SNARE interactions in vesicular transport                      | 4.97E-13             | 23                    | 1,730                |
| rctm0291..                | Cytosolic sensors of pathogen-associated DNA                   | 6.32E-13             | 39                    | 1,303                |
| rctm0171..                | Biological oxidations                                          | 5.71E-12             | 60                    | 3,848                |
| rctm0309                  | Deadenylation of mRNA                                          | 5.84E-11             | 10                    | 157                  |
| rctm0985..                | Regulation of APC/C activators between G1/S and early anaphase | 1.53E-10             | 182                   | 11,752               |
| rctm0744                  | NCAM1 interactions                                             | 1.81E-10             | 13                    | 332                  |
| rctm1333                  | Transport of vitamins, nucleosides, and related molecules      | 7.22E-10             | 12                    | 918                  |



Table S2 (Continued)

| <b>Module*<br/>(n=71)</b> | <b>Description</b>                                                                    | <b>FDR &lt; 0.05</b> | <b>n of<br/>genes</b> | <b>n of<br/>SNPs</b> |
|---------------------------|---------------------------------------------------------------------------------------|----------------------|-----------------------|----------------------|
| rctm0522..                | HIV Infection                                                                         | 2.98E-09             | 76                    | 3,975                |
| rctm0238..                | Chromosome maintenance                                                                | 4.34E-09             | 64                    | 4,302                |
| M9703                     | Role of BRCA1, BRCA2, and ATR in cancer susceptibility                                | 5.54E-09             | 10                    | 504                  |
| rctm1346..                | Unfolded protein response                                                             | 6.20E-09             | 42                    | 1,517                |
| rctm0654                  | Lysosome vesicle biogenesis                                                           | 1.25E-08             | 13                    | 517                  |
| M6981                     | Protein export                                                                        | 3.57E-08             | 12                    | 527                  |
| rctm1229..                | TGF-beta receptor signaling activates SMADs                                           | 3.87E-08             | 15                    | 491                  |
| rctm0709                  | Mitochondrial protein import                                                          | 8.94E-08             | 20                    | 1,006                |
| rctm0678                  | Membrane trafficking                                                                  | 9.13E-08             | 88                    | 4,377                |
| rctm0854..                | Peptide hormone metabolism                                                            | 2.34E-07             | 25                    | 1,229                |
| rctm0591..                | Innate immune system                                                                  | 2.51E-07             | 110                   | 4,381                |
| rctm0388..                | Extracellular matrix organization                                                     | 5.10E-07             | 88                    | 4,566                |
| M17400..                  | ALK in cardiac myocytes                                                               | 9.24E-07             | 20                    | 633                  |
| M11911..                  | ABC transporters                                                                      | 2.72E-06             | 22                    | 1,430                |
| M6370                     | p53 signaling pathway                                                                 | 3.33E-06             | 31                    | 2,397                |
| rctm0684..                | Metabolism of carbohydrates                                                           | 3.42E-06             | 78                    | 4,038                |
| M4383                     | Actions of nitric oxide in the heart                                                  | 2.25E-05             | 11                    | 182                  |
| M1547..                   | Control of skeletal myogenesis by HDAC and calcium/calmodulin-dependent kinase (CaMK) | 2.56E-05             | 17                    | 340                  |
| rctm0775                  | Netrin-1 signaling                                                                    | 4.99E-05             | 18                    | 788                  |
| rctm1169                  | Sphingolipid de novo biosynthesis                                                     | 5.50E-05             | 15                    | 542                  |
| M1519                     | Endocytosis                                                                           | 7.48E-05             | 90                    | 4,076                |
| rctm0339                  | Double-strand break repair                                                            | 9.80E-05             | 13                    | 655                  |
| rctm0598..                | Integration of energy metabolism                                                      | 0.0002               | 94                    | 3,926                |
| M8104                     | Amino sugar and nucleotide sugar metabolism                                           | 0.0009               | 30                    | 2,117                |
| rctm0933..                | Pyruvate metabolism and the citric acid (TCA) cycle                                   | 0.0010               | 25                    | 1,693                |
| rctm1081                  | SLC-mediated transmembrane transport                                                  | 0.0018               | 102                   | 5,420                |
| rctm0244..                | Class B/2 (secretin family receptors)                                                 | 0.0020               | 34                    | 1,222                |
| rctm0647                  | Lipid digestion, mobilization, and transport                                          | 0.0020               | 17                    | 573                  |
| rctm0289..                | Cytokine signaling in immune system                                                   | 0.0041               | 49                    | 1,636                |
| rctm0115                  | Antigen activates B-cell receptor leading to generation of second messengers          | 0.0043               | 20                    | 909                  |
| M615                      | Intestinal immune network for IgA production                                          | 0.0050               | 16                    | 402                  |
| M11673                    | Biosynthesis of unsaturated fatty acids                                               | 0.0054               | 14                    | 764                  |

Table S2 (Continued)

| <b>Module*<br/>(n=71)</b> | <b>Description</b>                                                                                                  | <b>FDR &lt; 0.05</b> | <b>n of<br/>genes</b> | <b>n of<br/>SNPs</b> |
|---------------------------|---------------------------------------------------------------------------------------------------------------------|----------------------|-----------------------|----------------------|
| rctm0800                  | Nuclear signaling by ERBB4                                                                                          | 0.0100               | 13                    | 861                  |
| rctm0475..                | GPCR downstream signaling                                                                                           | 0.0121               | 159                   | 7,055                |
| M19895                    | Nicotinate and nicotinamide metabolism                                                                              | 0.0133               | 14                    | 1,077                |
| rctm1110                  | Signal regulatory protein (SIRP) family interactions                                                                | 0.0193               | 11                    | 478                  |
| M8601                     | Rac 1 cell motility signaling pathway                                                                               | 0.0195               | 13                    | 745                  |
| M11106                    | Inactivation of Gsk3 by AKT causes accumulation of b-catenin in alveolar macrophages                                | 0.0258               | 13                    | 483                  |
| rctm1046..                | Respiratory electron transport, ATP synthesis by chemiosmotic coupling, and heat production by uncoupling proteins. | 0.0292               | 45                    | 2,536                |
| M9052..                   | Phosphatidylinositol signaling system                                                                               | 0.0417               | 51                    | 2,046                |

CRP, C-reactive protein; eQTL, expression quantitative trait loci; FDR, false discovery rate; MSE, marker-set enrichment analysis; SNP, single-nucleotide polymorphism.

\* Modules marked with two periods (..) are those that are merged.

Table S3. MSEA analysis of IL6 pathways (IL6, 50-kb distance-based mapping; pathways arranged by ascending FDR)

| <b>Module*<br/>(n=114)</b> | <b>Description</b>                                                | <b>FDR &lt; 0.05</b> | <b>n of<br/>genes</b> | <b>n of<br/>SNPs</b> |
|----------------------------|-------------------------------------------------------------------|----------------------|-----------------------|----------------------|
| M6889                      | Riboflavin metabolism                                             | 3.26E-45             | 14                    | 2,062                |
| M16743..                   | Tyrosine metabolism                                               | 3.47E-32             | 71                    | 10,034               |
| rctm0174                   | Biotin transport and metabolism                                   | 1.05E-31             | 10                    | 2,020                |
| M13917                     | Role of Parkin in the ubiquitin-proteasomal pathway               | 4.55E-29             | 11                    | 3,525                |
| M13720..                   | Lysine degradation                                                | 4.97E-24             | 53                    | 7,945                |
| rctm0933..                 | Pyruvate metabolism and the citric acid (TCA) cycle               | 2.51E-20             | 42                    | 5,770                |
| rctm0542..                 | Hormone ligand-binding receptors                                  | 2.12E-18             | 18                    | 2,332                |
| M11792..                   | Sonic hedgehog (Shh) pathway                                      | 3.22E-18             | 26                    | 4,803                |
| M16894..                   | Complement and coagulation cascades                               | 4.48E-17             | 79                    | 11,184               |
| rctm0281..                 | Cyclin A/B1 associated events during G2/M transition              | 6.69E-16             | 16                    | 1,863                |
| M10911..                   | Cysteine and methionine metabolism                                | 4.94E-13             | 39                    | 5,280                |
| M16848..                   | Epithelial cell signaling in <i>Helicobacter pylori</i> infection | 1.14E-12             | 88                    | 14,178               |
| rctm0061..                 | Activation of IRF3/IRF7 mediated by TBK1/IKK epsilon              | 7.34E-12             | 41                    | 5,143                |
| rctm1368                   | Voltage-gated potassium channels                                  | 9.30E-12             | 42                    | 8,706                |
| rctm0418..                 | Fc gamma receptor (FcγR) dependent phagocytosis                   | 1.33E-11             | 110                   | 14,986               |
| rctm0692..                 | Metabolism of porphyrins                                          | 3.31E-11             | 14                    | 1,957                |
| rctm0688..                 | Metabolism of nitric oxide                                        | 1.34E-10             | 23                    | 3,198                |
| rctm0804                   | Nucleotide-like (purinergic) receptors                            | 2.51E-10             | 12                    | 1,473                |
| M6778..                    | IL10 anti-inflammatory signaling pathway                          | 6.01E-10             | 37                    | 5,399                |
| M4741                      | Systemic lupus erythematosus                                      | 8.44E-10             | 62                    | 7,386                |
| rctm0854..                 | Peptide hormone metabolism                                        | 8.79E-10             | 79                    | 11,442               |
| M2044                      | Spliceosome                                                       | 1.47E-09             | 114                   | 12,267               |
| rctm0731..                 | Muscle contraction                                                | 2.08E-09             | 48                    | 6,966                |
| M19895                     | Nicotinate and nicotinamide metabolism                            | 9.58E-09             | 20                    | 2,695                |
| rctm0974                   | Recruitment of NuMA to mitotic centrosomes                        | 1.42E-08             | 10                    | 1,233                |
| M7528                      | Pantothenate and CoA biosynthesis                                 | 1.52E-08             | 16                    | 2,792                |
| M1840..                    | Glutathione metabolism                                            | 1.53E-08             | 49                    | 4,756                |
| M8809                      | Phosphoinositides and their downstream targets.                   | 1.58E-08             | 22                    | 4,223                |
| M4361                      | Proximal tubule bicarbonate reclamation                           | 2.23E-08             | 22                    | 2,737                |
| rctm0104                   | Amine-derived hormones                                            | 3.07E-08             | 15                    | 2,221                |
| rctm0800                   | Nuclear signaling by ERBB4                                        | 8.79E-08             | 35                    | 10,774               |
| M6856                      | Hematopoietic cell lineage                                        | 1.13E-07             | 79                    | 10,133               |
| M12718                     | Deregulation of CDK5 in Alzheimers Disease                        | 1.16E-07             | 10                    | 1,546                |

Table S3 (Continued)

| <b>Module*<br/>(n=114)</b> | <b>Description</b>                                                    | <b>FDR &lt; 0.05</b> | <b>n of<br/>genes</b> | <b>n of<br/>SNPs</b> |
|----------------------------|-----------------------------------------------------------------------|----------------------|-----------------------|----------------------|
| M5109..                    | Pyrimidine metabolism                                                 | 1.26E-07             | 131                   | 18,190               |
| M638                       | Adherens junction                                                     | 1.39E-07             | 72                    | 17,998               |
| M11521..                   | Glycolysis/gluconeogenesis                                            | 1.52E-07             | 71                    | 9,872                |
| M12039                     | One carbon pool by folate                                             | 1.66E-07             | 17                    | 2,782                |
| M13143..                   | uCalpain and friends in cell spread                                   | 2.24E-07             | 24                    | 6,677                |
| M963..                     | RNA degradation                                                       | 2.37E-07             | 64                    | 7,753                |
| M4377                      | Galactose metabolism                                                  | 3.01E-07             | 25                    | 3,870                |
| rctm0003..                 | 3'-UTR-mediated translational regulation                              | 3.05E-07             | 105                   | 11,873               |
| M523                       | Thyroid cancer                                                        | 4.60E-07             | 29                    | 4,664                |
| M4844..                    | Chemokine signaling pathway                                           | 4.76E-07             | 118                   | 17,763               |
| rctm0872..                 | Platelet activation, signaling, and aggregation                       | 6.28E-07             | 84                    | 14,144               |
| M4085                      | Primary immunodeficiency                                              | 8.93E-07             | 31                    | 3,806                |
| rctm0073                   | Activation of Rac                                                     | 1.20E-06             | 13                    | 3,490                |
| rctm0696..                 | Metabolism of vitamins and cofactors                                  | 1.23E-06             | 80                    | 12,408               |
| rctm0035..                 | Acetylcholine binding and downstream events                           | 1.71E-06             | 14                    | 1,607                |
| rctm0709                   | Mitochondrial protein import                                          | 1.75E-06             | 43                    | 4,749                |
| rctm0514                   | Glycosphingolipid metabolism                                          | 1.93E-06             | 33                    | 6,006                |
| rctm1346..                 | Unfolded protein response                                             | 1.93E-06             | 74                    | 8,801                |
| rctm0292                   | Cytosolic sulfonation of small molecules                              | 2.37E-06             | 17                    | 2,105                |
| rctm0178                   | Branched-chain amino acid catabolism                                  | 2.70E-06             | 16                    | 2,495                |
| rctm1333..                 | Transport of vitamins, nucleosides, and related molecules             | 3.07E-06             | 31                    | 5,640                |
| M16991..                   | Skeletal muscle hypertrophy regulated via AKT/mTOR pathway            | 3.32E-06             | 24                    | 3,394                |
| M19708                     | Type II diabetes mellitus                                             | 3.35E-06             | 45                    | 8,932                |
| rctm0689..                 | Metabolism of non-coding RNA                                          | 8.52E-06             | 48                    | 5,765                |
| M16004                     | Antigen processing and presentation                                   | 1.10E-05             | 58                    | 5,099                |
| rctm0540..                 | Homologous recombination repair                                       | 1.24E-05             | 16                    | 2,690                |
| M1519                      | Endocytosis                                                           | 1.58E-05             | 164                   | 28,535               |
| rctm0567                   | Immunoregulatory interactions between lymphoid and non-lymphoid cells | 2.40E-05             | 69                    | 8,040                |
| rctm1229..                 | TGF-beta receptor signaling activates SMADs                           | 3.02E-05             | 29                    | 3,868                |
| rctm0773                   | Nephrin interactions                                                  | 4.47E-05             | 22                    | 5,486                |
| rctm0308                   | DSCAM interactions                                                    | 6.37E-05             | 11                    | 4,503                |
| rctm0871..                 | Platelet aggregation (plug formation)                                 | 6.49E-05             | 37                    | 5,745                |
| M13088                     | PPAR signaling pathway                                                | 0.0002               | 66                    | 9,463                |

Table S3 (Continued)

| <b>Module*<br/>(n=114)</b> | <b>Description</b>                                                                    | <b>FDR &lt; 0.05</b> | <b>n of<br/>genes</b> | <b>n of<br/>SNPs</b> |
|----------------------------|---------------------------------------------------------------------------------------|----------------------|-----------------------|----------------------|
| rctm0873                   | Platelet calcium homeostasis                                                          | 0.0002               | 18                    | 4,505                |
| rctm0573..                 | Inflammasomes                                                                         | 0.0003               | 17                    | 2,478                |
| rctm0494                   | Generation of second messenger molecules                                              | 0.0004               | 19                    | 2,408                |
| rctm0252..                 | Cleavage of growing transcript in the termination region                              | 0.0005               | 29                    | 3,572                |
| rctm0624..                 | Ion channel transport                                                                 | 0.0006               | 101                   | 21,502               |
| M7963..                    | Cell cycle                                                                            | 0.0011               | 136                   | 17,300               |
| rctm0695..                 | Metabolism of steroid hormones and vitamin D                                          | 0.0016               | 28                    | 4,145                |
| rctm1287                   | Trafficking and processing of endosomal TLR                                           | 0.0021               | 11                    | 1,386                |
| M3952                      | Cells and molecules involved in local acute inflammatory response                     | 0.0025               | 17                    | 2,791                |
| M1296..                    | IL7 signal transduction                                                               | 0.0025               | 19                    | 2,594                |
| rctm0805..                 | O-linked glycosylation of mucins                                                      | 0.0032               | 55                    | 11,504               |
| rctm1129                   | Signaling by Hippo                                                                    | 0.0037               | 17                    | 3,112                |
| rctm0870                   | Platelet adhesion to exposed collagen                                                 | 0.0038               | 11                    | 2,123                |
| M12899                     | Glycosphingolipid biosynthesis—globo series                                           | 0.0038               | 13                    | 1,824                |
| rctm0517                   | Golgi cisternae pericentriolar stack reorganization                                   | 0.0047               | 12                    | 1,446                |
| M6981                      | Protein export                                                                        | 0.0047               | 22                    | 3,115                |
| rctm0115                   | Antigen activates B-cell receptor leading to generation of second messengers          | 0.0048               | 32                    | 6,364                |
| rctm1327..                 | Transport of inorganic cations/anions and amino acids/oligopeptides                   | 0.0053               | 158                   | 24,857               |
| rctm1117..                 | Signaling by ERBB4                                                                    | 0.0080               | 127                   | 21,734               |
| rctm0128..                 | Arachidonic acid metabolism                                                           | 0.0084               | 74                    | 8,647                |
| M12617..                   | Type I diabetes mellitus                                                              | 0.0098               | 28                    | 4,869                |
| M3896..                    | Inositol phosphate metabolism                                                         | 0.0105               | 67                    | 11,598               |
| M225                       | Downregulated of MTA-3 in ER-negative breast tumors                                   | 0.0151               | 18                    | 2,543                |
| rctm0415..                 | Fatty acid, triacylglycerol, and ketone body metabolism                               | 0.0165               | 100                   | 16,308               |
| M1547                      | Control of skeletal myogenesis by HDAC and calcium/calmodulin-dependent kinase (CaMK) | 0.0170               | 28                    | 4,664                |
| M111..                     | Roles of fl-arrestin-dependent recruitment of Src kinases in GPCR signaling           | 0.0173               | 18                    | 3,383                |
| M11266                     | Lysosome                                                                              | 0.0178               | 117                   | 16,985               |
| rctm0893..                 | Pre-NOTCH expression and processing                                                   | 0.0199               | 42                    | 6,093                |
| rctm0997                   | Regulation of insulin secretion by acetylcholine                                      | 0.0214               | 10                    | 3,443                |
| rctm0775                   | Netrin-1 signaling                                                                    | 0.0220               | 40                    | 11,381               |

Table S3 (Continued)

| <b>Module*<br/>(n=114)</b> | <b>Description</b>                                                       | <b>FDR &lt; 0.05</b> | <b>n of<br/>genes</b> | <b>n of<br/>SNPs</b> |
|----------------------------|--------------------------------------------------------------------------|----------------------|-----------------------|----------------------|
| rctm0677                   | Meiotic synapsis                                                         | 0.0227               | 39                    | 5,677                |
| rctm0118..                 | Antigen processing: ubiquitination and proteasome degradation            | 0.0228               | 163                   | 24,495               |
| M5374                      | The SARS-coronavirus life cycle                                          | 0.0229               | 10                    | 1,177                |
| rctm0762                   | Na <sup>+</sup> /Cl <sup>-</sup> dependent neurotransmitter transporters | 0.0242               | 18                    | 2,875                |
| rctm0013                   | AKT phosphorylates targets in the cytosol                                | 0.0288               | 13                    | 1,794                |
| rctm1014                   | Regulation of gene expression in beta cells                              | 0.0292               | 19                    | 2,428                |
| rctm1268                   | The phototransduction cascade                                            | 0.0297               | 29                    | 4,862                |
| rctm0312..                 | Defensins                                                                | 0.0320               | 36                    | 2,776                |
| rctm1132..                 | Signaling by NODAL                                                       | 0.0329               | 19                    | 2,353                |
| rctm0368                   | Elastic fiber formation                                                  | 0.0331               | 41                    | 7,094                |
| M13324                     | Hypoxia-inducible factor in the cardiovascular system                    | 0.0334               | 13                    | 1,350                |
| rctm0271..                 | Constitutive signaling by NOTCH1 PEST domain mutants                     | 0.0338               | 62                    | 9,671                |
| rctm1110                   | Signal regulatory protein (SIRP) family interactions                     | 0.0370               | 13                    | 2,294                |
| rctm0968                   | Ras activation upon Ca <sup>2+</sup> influx through NMDA receptor        | 0.0370               | 17                    | 3,734                |
| M6370                      | p53 signaling pathway                                                    | 0.0383               | 66                    | 8,483                |
| M10401                     | Telomeres, telomerase, cellular aging, and immortality                   | 0.0421               | 17                    | 4,390                |
| rctm0947..                 | RNA polymerase I, RNA polymerase III, and mitochondrial transcription    | 0.0424               | 102                   | 13,022               |
| M4629..                    | Nitrogen metabolism                                                      | 0.0426               | 22                    | 2,521                |

FDR, false discovery rate; IL6, interleukin-6; MSEA, marker-set enrichment analysis; SNP, single-nucleotide polymorphism.

\* Modules marked with two periods (..) are those that are merged.

Table S4. MSEA analysis of IL6 pathways (IL6, eQTL-based mapping to genes; pathways arranged by ascending FDR)

| <b>Module*<br/>(n=55)</b> | <b>Description</b>                                                        | <b>FDR &lt; 0.05</b> | <b>n of<br/>genes</b> | <b>n of<br/>SNPs</b> |
|---------------------------|---------------------------------------------------------------------------|----------------------|-----------------------|----------------------|
| M2044..                   | Spliceosome                                                               | 4.20E-60             | 75                    | 2,796                |
| rctm1147..                | Signaling by TGF-beta receptor complex                                    | 2.61E-47             | 33                    | 1,363                |
| M16743..                  | Tyrosine metabolism                                                       | 7.75E-42             | 37                    | 2,591                |
| M699..                    | Fatty acid metabolism                                                     | 6.82E-36             | 56                    | 4,504                |
| M9387..                   | Vascular smooth muscle contraction                                        | 1.25E-33             | 73                    | 3,768                |
| rctm1133..                | Signaling by NOTCH                                                        | 2.32E-27             | 40                    | 2,829                |
| rctm0475..                | GPCR downstream signaling                                                 | 5.14E-24             | 153                   | 6,934                |
| M14091..                  | Olfactory transduction                                                    | 1.87E-23             | 21                    | 1,075                |
| M4361..                   | Proximal tubule bicarbonate reclamation                                   | 1.46E-22             | 18                    | 914                  |
| M1519                     | Endocytosis                                                               | 1.54E-22             | 88                    | 4,473                |
| rctm0707                  | Mitochondrial fatty acid beta-oxidation                                   | 1.98E-22             | 11                    | 881                  |
| rctm0647                  | Lipid digestion, mobilization, and transport                              | 3.25E-20             | 15                    | 602                  |
| M19428..                  | Wnt signaling pathway                                                     | 1.48E-19             | 70                    | 3,273                |
| rctm0690..                | Metabolism of nucleotides                                                 | 1.86E-17             | 46                    | 3,278                |
| rctm0388..                | Extracellular matrix organization                                         | 3.73E-16             | 68                    | 3,102                |
| rctm1327..                | Transport of inorganic cations/anions and amino acids/oligopeptides       | 4.08E-15             | 40                    | 1,775                |
| rctm1117..                | Signaling by ERBB4                                                        | 5.00E-12             | 89                    | 5,324                |
| rctm0894                  | Pre-NOTCH processing in Golgi                                             | 1.47E-11             | 13                    | 1,742                |
| M3985                     | The citrate cycle (TCA cycle)                                             | 4.87E-11             | 11                    | 844                  |
| rctm0805..                | O-linked glycosylation of mucins                                          | 5.84E-11             | 34                    | 1,335                |
| M7528                     | Pantothenate and CoA biosynthesis                                         | 6.27E-11             | 10                    | 613                  |
| M2642..                   | TGF-beta signaling pathway                                                | 2.73E-10             | 43                    | 1,848                |
| M11266                    | Lysosome                                                                  | 4.39E-10             | 84                    | 6,814                |
| M1001..                   | Rho cell motility signaling pathway                                       | 1.05E-09             | 34                    | 1,824                |
| rctm0332..                | Diseases associated with visual transduction                              | 3.80E-09             | 30                    | 1,039                |
| M18306..                  | Regulation of actin cytoskeleton                                          | 5.77E-09             | 81                    | 4,147                |
| rctm1180..                | Sulfur amino acid metabolism                                              | 5.68E-08             | 23                    | 1,234                |
| M5410..                   | Arachidonic acid metabolism                                               | 1.60E-07             | 28                    | 1,485                |
| rctm0686                  | Metabolism of lipids and lipoproteins                                     | 5.67E-07             | 265                   | 14,798               |
| rctm0845                  | PTM: gamma carboxylation, hypusine formation and arylsulfatase activation | 6.09E-07             | 13                    | 806                  |
| rctm0709                  | Mitochondrial protein import                                              | 9.00E-07             | 20                    | 1,252                |
| rctm1309                  | Translocation of GLUT4 to the plasma membrane                             | 1.12E-06             | 29                    | 2,261                |
| rctm0689..                | Metabolism of non-coding RNA                                              | 3.15E-06             | 47                    | 2,911                |

Table S4 (Continued)

| <b>Module*<br/>(n=55)</b> | <b>Description</b>                                                     | <b>FDR &lt; 0.05</b> | <b>n of<br/>genes</b> | <b>n of<br/>SNPs</b> |
|---------------------------|------------------------------------------------------------------------|----------------------|-----------------------|----------------------|
| M7330                     | Glycosaminoglycan biosynthesis—heparan sulfate                         | 3.41E-06             | 15                    | 458                  |
| M11190                    | Dorsoventral axis formation                                            | 5.82E-06             | 14                    | 2,230                |
| M7934                     | Pyruvate metabolism                                                    | 6.87E-06             | 22                    | 1,515                |
| rctm0223..                | Cell-surface interactions at the vascular wall                         | 7.45E-06             | 76                    | 4,133                |
| M17844                    | Other glycan degradation                                               | 7.63E-06             | 15                    | 1,083                |
| rctm0625                  | Ion transport by P-type ATPases                                        | 1.36E-05             | 21                    | 816                  |
| M4047..                   | Selective expression of chemokine receptors during T-cell polarization | 1.50E-05             | 19                    | 1,108                |
| M17411                    | JAK-STAT signaling pathway                                             | 1.70E-05             | 46                    | 1,547                |
| rctm0492..                | Gastrin-CREB signaling pathway via PKC and MAPK                        | 2.57E-05             | 115                   | 5,799                |
| rctm1170..                | Sphingolipid metabolism                                                | 0.0002               | 39                    | 2,274                |
| M14691..                  | Aminoacyl-tRNA biosynthesis                                            | 0.0005               | 32                    | 2,582                |
| M5539                     | Axon guidance                                                          | 0.0005               | 52                    | 2,561                |
| M5940                     | Endocytotic role of NDK, phosphins and dynamin                         | 0.0009               | 14                    | 532                  |
| M5500                     | Base excision repair                                                   | 0.0025               | 17                    | 452                  |
| rctm0884..                | Post-elongation processing of intronless pre-mRNA                      | 0.0032               | 11                    | 606                  |
| rctm0376                  | Energy-dependent regulation of mTOR by LKB1-AMPK                       | 0.0058               | 10                    | 625                  |
| M11675                    | Homologous recombination                                               | 0.0077               | 12                    | 954                  |
| rctm0508..                | Glycerophospholipid biosynthesis                                       | 0.0082               | 42                    | 1,961                |
| rctm0613                  | Interferon gamma signaling                                             | 0.0283               | 26                    | 970                  |
| rctm0224..                | Cell–cell communication                                                | 0.0310               | 50                    | 2,186                |
| rctm0261..                | Complement cascade                                                     | 0.0384               | 48                    | 2,266                |
| rctm0732..                | MyD88 cascade initiated on plasma membrane                             | 0.0475               | 87                    | 3,154                |

FDR, false discovery rate; IL6, interleukin-6; eQTL, expression quantitative trait loci; MSEA, marker-set enrichment analysis; SNP, single-nucleotide polymorphism.

\* Modules marked with two periods (..) are those that are merged.



Table S5. Tissue-specific shared pathways and KD genes across BC development and CRP/IL6

| <b>Pathway Description</b>                                               | <b>Adipose</b>              | <b>Liver</b> | <b>PPI</b>                                                               |
|--------------------------------------------------------------------------|-----------------------------|--------------|--------------------------------------------------------------------------|
| Iron uptake and transport¶                                               | N/A                         | N/A          | <i>ATP6V1D*</i> , <i>ATP6V0C*</i>                                        |
| Glucose metabolism¥                                                      | N/A                         | N/A          | <i>PYGB†</i>                                                             |
| Immunoregulatory interactions between lymphoid and non-lymphoid cells¶   | <i>CD3G*</i>                | N/A          | N/A                                                                      |
| Selective expression of chemokine receptors during T-cell polarization¶¥ | <i>CD3D*</i> , <i>CD3G*</i> | <i>CD3G*</i> | <i>IL4*†</i> , <i>JAK2*†</i> , <i>IL2*</i>                               |
| JAK-STAT signaling pathway¥                                              | N/A                         | N/A          | <i>JAK1†</i> , <i>JAK3†</i> , <i>TYK2†</i> , <i>IL4†</i> , <i>STAT6†</i> |

BC, breast cancer; CRP, C-reactive protein; eQTL, expression quantitative trait loci; IL6, interleukin-6; JAK-STAT, Janus kinase-signal transducer and activator of transcription; KD, key driver; N/A, not available; PPI, protein-to-protein interaction.

¶ Pathway overlapping supersets from CRP/IL6 meta-analysis on distance mapping.

¥ Pathway overlapping supersets from CRP/IL6 meta-analysis on eQTL mapping.

\* KD member gene overlapped between BC and CRP/IL6 in the shared pathway on distance mapping.

† KD member gene overlapped between BC and CRP/IL6 in shared pathways on eQTL mapping.
